# Supplementary material for: Neighborhood-Level Socioeconomic Status and Prescription Fill Patterns Among Patients With Heart Failure
Source: PubMed Central journal article supplement (PMC10722333; doi:10.1001/jamanetworkopen.2023.47519), 2023-12-14
Supplement: jamanetwopen-e2347519-s002.pdf [file jamanetwopen-e2347519-s002.pdf]

## Data Sharing Statement

Mukhopadhyay. Neighborhood-Level Socioeconomic Status and Prescription Fill Patterns Among Patients With Heart Failure. *JAMA Netw Open*. Published December 14, 2023. doi:10.1001/jamanetworkopen.2023.47519

### Data

**Data available:** No
